# Supplementary material for: Voltage-induced calcium release in Caenorhabditis elegans body muscles
Source: PubMed Central journal article supplement — Proc Natl Acad Sci U S A. 2024 Apr 30;121(19):e2317753121. doi: 10.1073/pnas.2317753121 (PMC11087772; doi:10.1073/pnas.2317753121), 2024-04-30
Supplement: pnas.2317753121.sapp.pdf [file pnas.2317753121.sapp.pdf]

## Supporting Information for

### Voltage-induced calcium release in *C. elegans* body muscles

Luna Gao, Evan Ardiel, Stephen Nurrish, and Joshua M. Kaplan

Corresponding Author: Joshua M. Kaplan

Email: [kaplan@molbio.mgh.harvard.edu](mailto:kaplan@molbio.mgh.harvard.edu)

#### This PDF file includes:

- Figures S1 to S3
- Table S1
- SI References

#### Other supporting materials for this manuscript include the following:

- Dataset S1

S1a

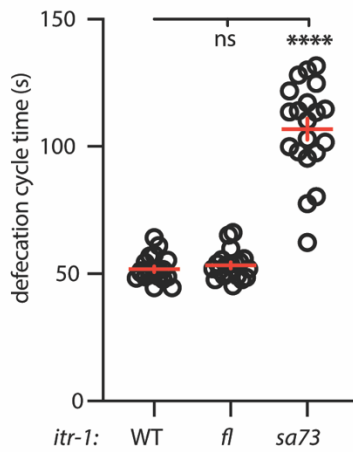

S1b

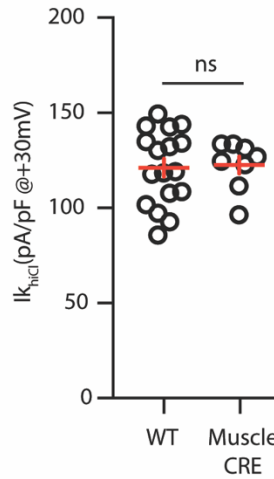

**Supplemental Figure 1. Supplementary data for Figure 1.** (A) Mean defecation cycle duration is plotted in the indicated genotypes. Defecation cycles are significantly longer in a hypomorphic *itr-1(sa73)* mutant but were unaffected in the non-excised *itr-1(fl)* mutants. These results suggest that ITR-1 function was not significantly impaired by insertion of the LoxP sites. (B)  $I_{k_{hiCl}}$  was unaffected by CRE expression in WT body muscles. Mean  $I_{k_{hiCl}}$  current density at +30 mV is plotted for WT and *nuSi572 Pmyo-3::CRE* animals. These results suggest that SLO-2 defects observed in muscle knockout strains are unlikely to result from toxicity associated with CRE expression. Values that differ significantly are indicated (ns, not significant; \*\*\*\*,  $p < 0.0001$ ). Error bars indicate SEM.

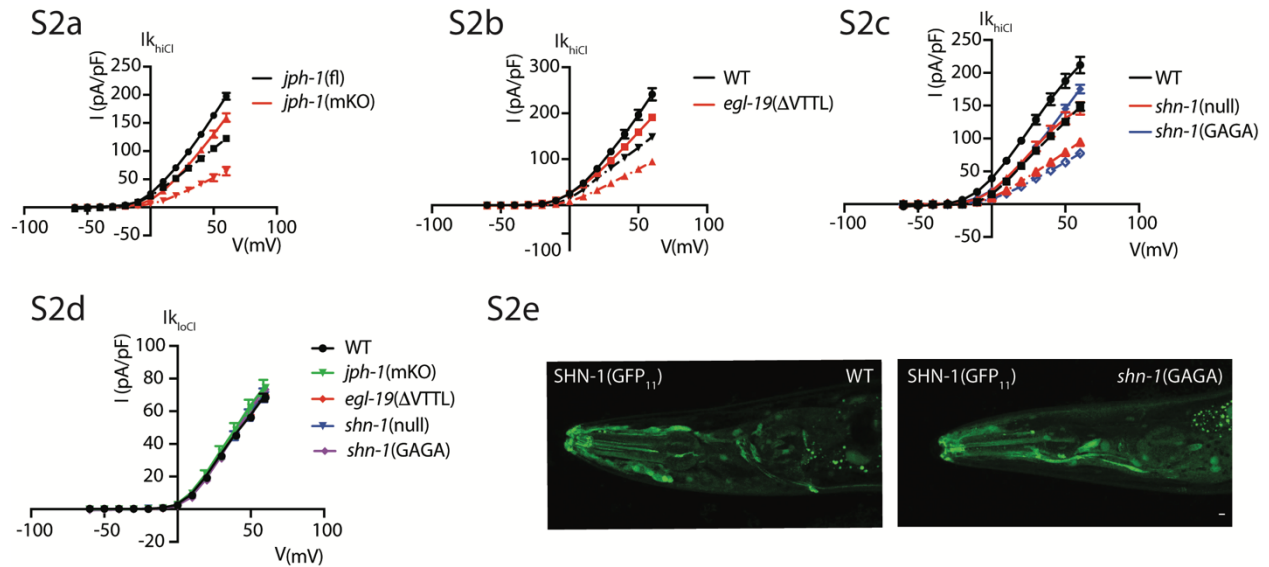

**Supplemental Figure 2. Supplementary data for Figure 4.** (A-C)  $I_{k_{hiCl}}$  currents were recorded from adult body wall muscles at holding potentials of -60 to +60 mV with 5 mM (solid lines) and 0 mM (dashed lines) external calcium. Mean current density is plotted as a function of membrane potential. (D) SHK-1 ( $I_{k_{loCl}}$ ) currents were unaffected in *jph-1(mKO)*, *egl-19(ΔVTTL)*, *shn-1(null)*, and *shn-1(GAGA)* mutants. Mean  $I_{k_{loCl}}$  current density is plotted as a function of membrane potential. (E) Expression of endogenous SHN-1 is unaffected in *shn-1(GAGA)* mutants. SHN-1(GFP<sub>11</sub>) fluorescence was reconstituted by expressing GFP<sub>1-10</sub> with a ubiquitous promoter (*eft-3*). Representative images are shown. Error bars indicate SEM. Scale bar indicates 4  $\mu$ m.

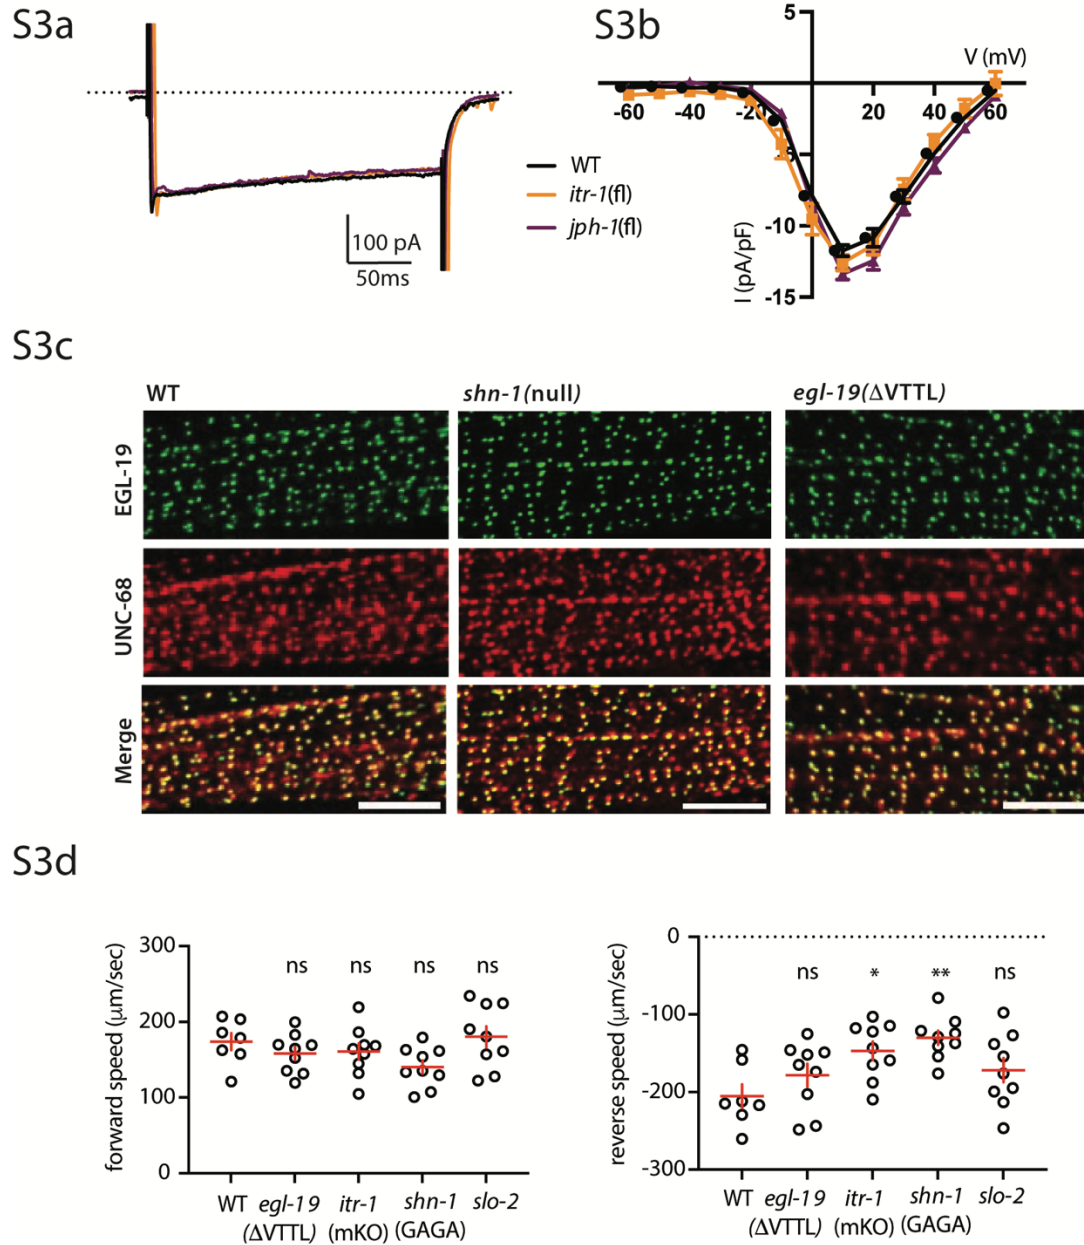

**Supplemental Figure 3. Supplementary data for Figure 5.** EGL-19/CaV1 currents were recorded from adult body wall muscles at holding potentials of -60 to +60 mV in the indicated genotypes. Representative traces (at +20 mV) (A) and mean current density as a function of membrane potential (B) are shown. EGL-19 current was unaffected in strains containing the *itr-1*(*nu774 FLOX*) and *jph-1*(*nu733 FLEX*) alleles. (C) Representative images of EGL-19(*nu674 GFP<sub>11</sub>*) and UNC-68(*nu628 Cherry<sub>11</sub>*) co-localization are shown in WT, *egl-19*( $\Delta$ VTTL), and *shn-1*(*nu712 null*)

mutants. GFP<sub>11</sub> and Cherry<sub>11</sub> fluorescence were reconstituted by expressing GFP<sub>1-10</sub> and Cherry<sub>1-10</sub> in body muscles. (D) Forward and reverse locomotion rate of adults was compared for the indicated genotypes. Error bars indicate SEM. Values that differ significantly from WT controls are indicated (ns, not significant; \*,  $p < 0.05$ ; \*\*,  $p < 0.01$ ). Scale bars indicate 5  $\mu\text{m}$ .

**Supplemental Table 1. Key resources table**

| REAGENT or RESOURCE                                                                                          | SOURCE        | IDENTIFIER                                                                            |
|--------------------------------------------------------------------------------------------------------------|---------------|---------------------------------------------------------------------------------------|
| <b>Chemicals, peptides, and recombinant proteins</b>                                                         |               |                                                                                       |
| Nemadipine-A: L-type calcium channel protein inhibitor                                                       | ABCAM         | Catalog #:ab145991                                                                    |
| Cyclopiazonic acid: SERCA pump inhibitor                                                                     | Sigma-Aldrich | Catalog #:C1530                                                                       |
| <b>Experimental models: Organisms/strains</b>                                                                |               |                                                                                       |
| strain ( <i>C. elegans</i> ) N2                                                                              | CGC           | Wormbase ID:N2                                                                        |
| <i>C. elegans</i> : Strain LY100 <i>slo-2(nf100)</i>                                                         | CGC           | LY100                                                                                 |
| <i>C. elegans</i> : Strain TR2171 <i>unc-68(r1162)</i>                                                       | CGC           | TR2171                                                                                |
| strain ( <i>C. elegans</i> ) KP10950 <i>itr-1(nu774 FLOX)</i>                                                | This study    | KP10950                                                                               |
| strain ( <i>C. elegans</i> ) KP10696 <i>nuSi572 myo-3::CRE</i>                                               | (1)           | KP10696                                                                               |
| strain ( <i>C. elegans</i> ) KP10972 <i>itr-1(nu774 FLOX); nuSi572</i>                                       | This study    | KP10972                                                                               |
| strain ( <i>C. elegans</i> ) KP11233 <i>unc-68(r1162); itr-1(nu774 FLOX); nuSi572</i>                        | This study    | KP11233                                                                               |
| strain ( <i>C. elegans</i> ) KP10407 <i>jph-1(nu733 FLEX)</i>                                                | This study    | KP10407                                                                               |
| strain ( <i>C. elegans</i> ) KP11152 <i>jph-1(nu733 FLEX); nuSi572</i>                                       | This study    | KP11152                                                                               |
| strain ( <i>C. elegans</i> ) KP7992 <i>egl-19(nu496 ΔVTTL)</i>                                               | (2)           | KP7992                                                                                |
| strain ( <i>C. elegans</i> ) KP10151 <i>shn-1(nu712)</i>                                                     | (1)           | KP10151                                                                               |
| strain ( <i>C. elegans</i> ) KP9232 <i>shn-1(nu604 GFP11);nuSi205 Peft-3::GFP1-10</i>                        | (1)           | KP9232                                                                                |
| strain ( <i>C. elegans</i> ) KP11704 <i>shn-1(nu793 GAGA nu604 GFP11);nuSi205 Peft-3::GFP1-10</i>            | This study    | KP11704                                                                               |
| strain ( <i>C. elegans</i> ) KP10373 <i>nuSi456 pat-10::Cherry1-10 SL2 GFP1-10</i>                           | (3)           | KP10373                                                                               |
| strain ( <i>C. elegans</i> ) KP11234 <i>egl-19(nu674 GFP11);nuSi456</i>                                      | This study    | KP11234                                                                               |
| strain ( <i>C. elegans</i> ) KP11235 <i>unc-68(r1162); egl-19 (nu674 GFP11);nuSi456</i>                      | This study    | KP11235                                                                               |
| strain ( <i>C. elegans</i> ) JT73 <i>itr-1(sa73)</i>                                                         | CGC           | JT73                                                                                  |
| strain ( <i>C. elegans</i> ) KP10405 <i>egl-19(nu674 GFP11);unc-68(nu628 Cherry11);nuSi456</i>               | (3)           | KP10405                                                                               |
| strain ( <i>C. elegans</i> ) KP11253 <i>egl-19(nu496 ΔVTTL nu674 GFP11);unc-68(nu628 Cherry11);nuSi456</i>   | This study    | KP11253                                                                               |
| strain ( <i>C. elegans</i> ) KP11260 <i>shn-1(nu712); egl-19(nu674 GFP11);unc-68(nu628 Cherry11);nuSi456</i> | This study    | KP11260                                                                               |
| <b>Oligonucleotides</b>                                                                                      |               |                                                                                       |
| ttacctgacatgatggacacAGG                                                                                      | IDT           | guide RNA for x7 GFP11 insertion at <i>egl-19</i> codon 2                             |
| gatgctgcagccacgggcggtGG                                                                                      | IDT           | guide RNA for x4 CherryFP11 insertion at <i>unc-68A</i> codon 5202                    |
| ccacgtggtgtcaagggtCGG                                                                                        | IDT           | guide RNA for mutation of the <i>shn-1</i> PDZ domain                                 |
| gttagcaccgatccttgcTGG                                                                                        | IDT           | Guide RNA for insertions into the 1 <sup>st</sup> exon of <i>jph-1</i>                |
| caaagttagcgttataggtcCGG                                                                                      | IDT           | Guide RNA for insertion 5' loxP site into the 8 <sup>th</sup> intron of <i>itr-1A</i> |
| aataaaaatacgttgaagacAGG                                                                                      | IDT           | Guide RNA for insertion of 3' loxP site into the 3' UTR of <i>itr-1A</i>              |

|                                                                                                                                                       |                   |                                                                                                         |
|-------------------------------------------------------------------------------------------------------------------------------------------------------|-------------------|---------------------------------------------------------------------------------------------------------|
| ATGATTGCAGCTGGACACGAGACAAATATCGCTCGATTCTGGTG<br>ATCCGCGGGGAGTGAAAGGAGCTGGTGCAATTGCTAGAGGAG<br>CTAAACGTAAATTCCTTTTCTTATGTAAGTCTCAATAATT                | IDT               | Repair oligonucleotide to make shn-1(nu793 GAGA) mutation                                               |
| tcaaacaaaacttagtttacttgcatgttgataataattgctgctgtccgATAACTTC<br>GTATAgcatacatTATACGAAGTTATcggccgacctataacgctaactttgct<br>attactaattttgaaacacaacgggatccc | IDT               | Repair oligonucleotide to insert loxP site into the 8 <sup>th</sup> intron of itr-1A                    |
| aacctgttagctgttttcaaaccggtattcaatgttttttttacctATAACTTCG<br>TATAgcatacatTATACGAAGTTATcggccgtcttcaacgtattttttttcgc<br>tctttatcaagtttgattttcaa           | IDT               | Repair oligonucleotide to insert loxP site into the 3' UTR of itr-1A                                    |
| ttactgacatgatggacacAGG                                                                                                                                | IDT               | guide RNA for x7 GFP11 insertion at egl-19 codon 2                                                      |
| <b>Recombinant DNA</b>                                                                                                                                |                   |                                                                                                         |
| Plasmid: KP#4527 Pmyo-3 NLS CRE SL2 NLS BFP miniMOS hyg                                                                                               | This study        | Expresses nuclear localized CRE recombinase and BFP in body wall muscles                                |
| Plasmid: KP#4522 Ppat-10 Cherry 1-10 SL2 GFP 1-10 G418                                                                                                | (3)               | Expresses Cherry 1-10 and GFP 1-10 in body wall muscles                                                 |
| Plasmid KP#3323 jph-1 1st intron FLEX ON to OFF repair                                                                                                | This study        | Repair template for insertion of FLEX cassette into the 1 <sup>st</sup> intron of jph-1                 |
| <b>Software and algorithms</b>                                                                                                                        |                   |                                                                                                         |
| ImageJ /Fiji                                                                                                                                          | NIH               | <a href="https://fiji.sc/">https://fiji.sc/</a>                                                         |
| pClamp 10                                                                                                                                             | Molecular Devices | <a href="https://www.moleculardevices.com">https://www.moleculardevices.com</a>                         |
| Prism9                                                                                                                                                | GraphPad          | <a href="https://www.graphpad.com">https://www.graphpad.com</a>                                         |
| OriginLab                                                                                                                                             | OriginLab         | <a href="https://www.originlab.com/">https://www.originlab.com/</a>                                     |
| Adobe illustrator 2020                                                                                                                                | Adobe             | Adobe.com                                                                                               |
| Tierpsy Worm Tracker                                                                                                                                  | (4)               | <a href="https://github.com/Tierpsy/tierpsy-tracker">https://github.com/Tierpsy/tierpsy-tracker</a>     |
| NIS Elements                                                                                                                                          | Nikon             | <a href="https://www.microscope.healthcare.nikon.com/">https://www.microscope.healthcare.nikon.com/</a> |
| <b>Other</b>                                                                                                                                          |                   |                                                                                                         |
| Polybead Microspheres 0.10µm                                                                                                                          | Polysciences Inc  | Catalog #: 00876-15                                                                                     |
|                                                                                                                                                       |                   |                                                                                                         |

## SI References

1. L. Gao *et al.*, Shank promotes action potential repolarization by recruiting BK channels to calcium microdomains. *Elife* **11** (2022).
2. E. Pym *et al.*, Shank is a dose-dependent regulator of Cav1 calcium current and CREB target expression. *Elife* **6** (2017).
3. C. A. Piggott *et al.*, Caenorhabditis elegans Junctophilin has tissue-specific functions and regulates neurotransmission with extended-synaptotagmin. *Genetics* 10.1093/genetics/iyab063 (2021).
4. A. Javer *et al.*, An open-source platform for analyzing and sharing worm-behavior data. *Nat Methods* **15**, 645-646 (2018).
